# Supplementary material
Source: PubMed Central journal article supplement (PMC2000446)

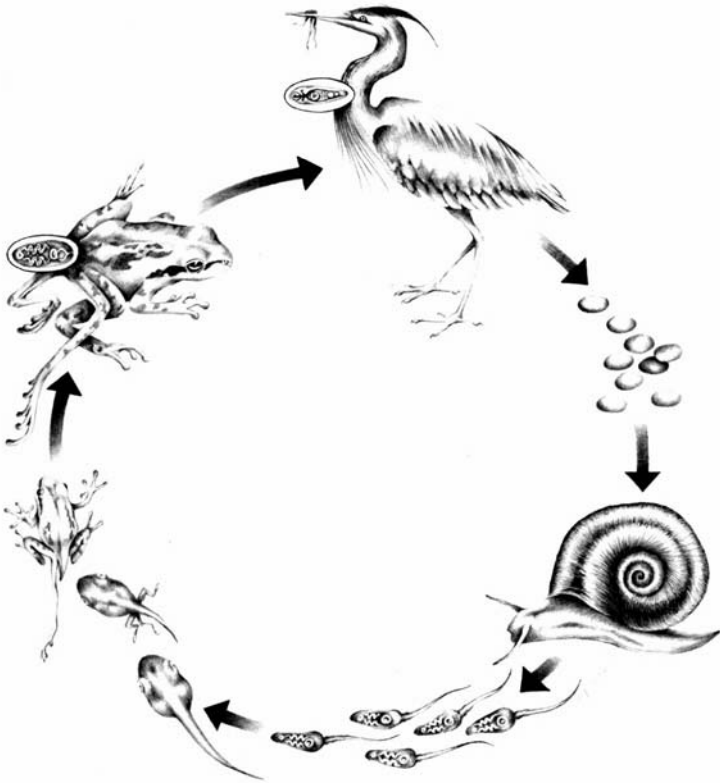

Supplement: pnas_0707763104_1.pdf [file pnas_0707763104_1.pdf]

### High Nutrient Condition

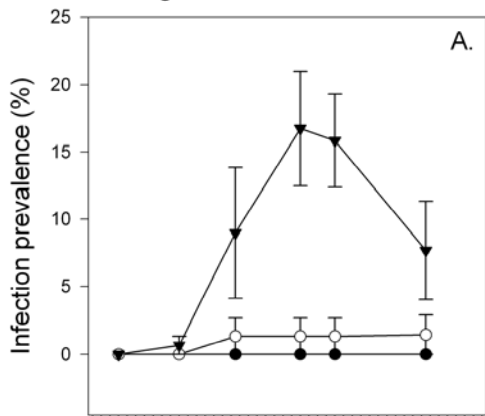

### Low Nutrient Condition

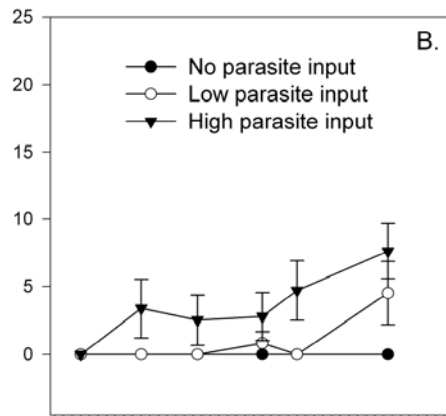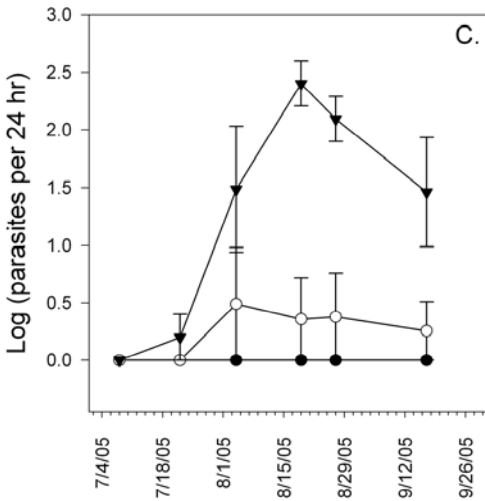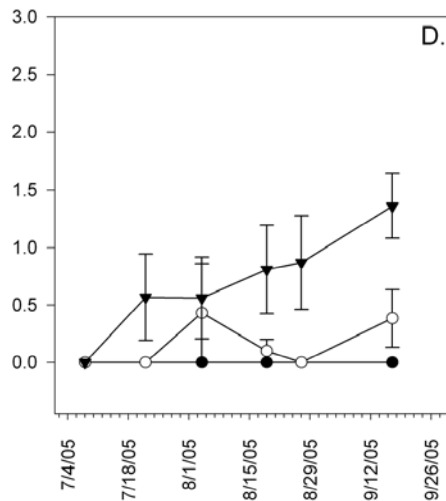

Supplement: pnas_0707763104_2.pdf [file pnas_0707763104_2.pdf]

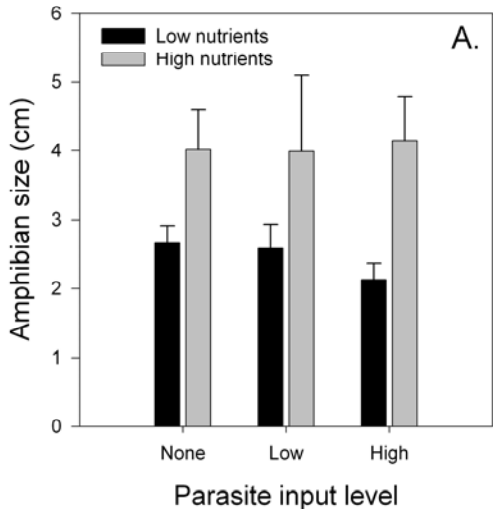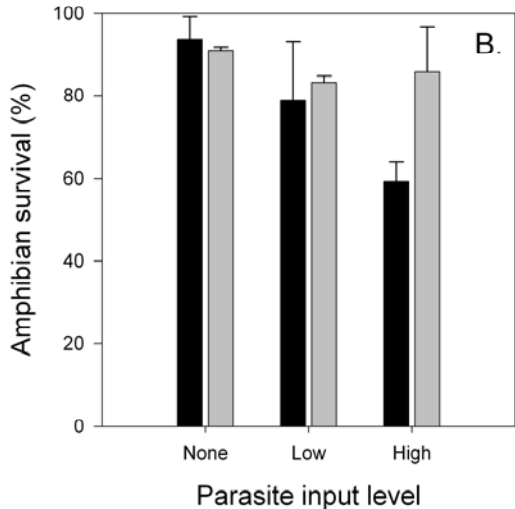

Supplement: pnas_0707763104_3.pdf [file pnas_0707763104_3.pdf]
